# Supplementary material for: Identification of a peptide inhibitor for the histone methyltransferase WHSC1
Source: PubMed Central journal article supplement (PMC5942779; doi:10.1371/journal.pone.0197082), 2018-05-09

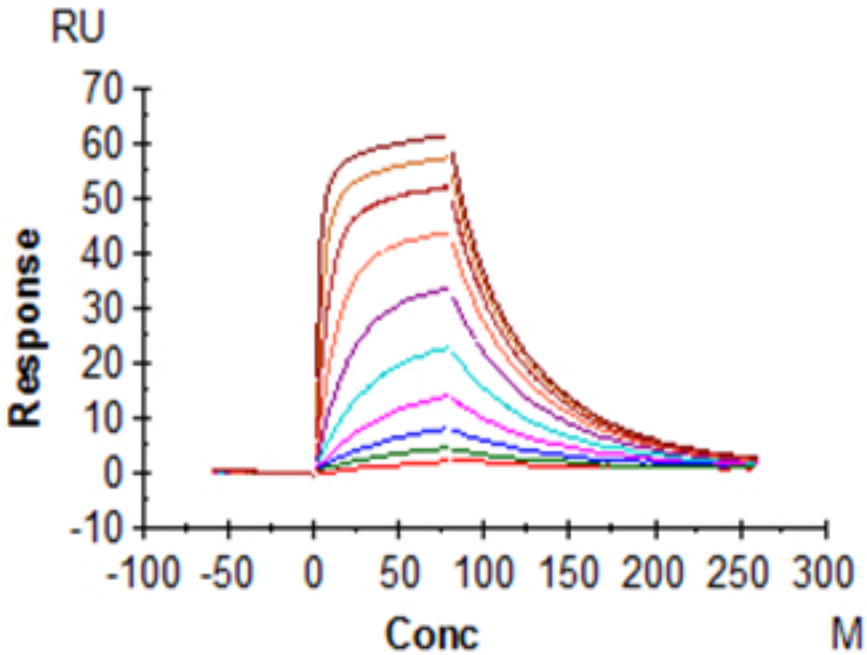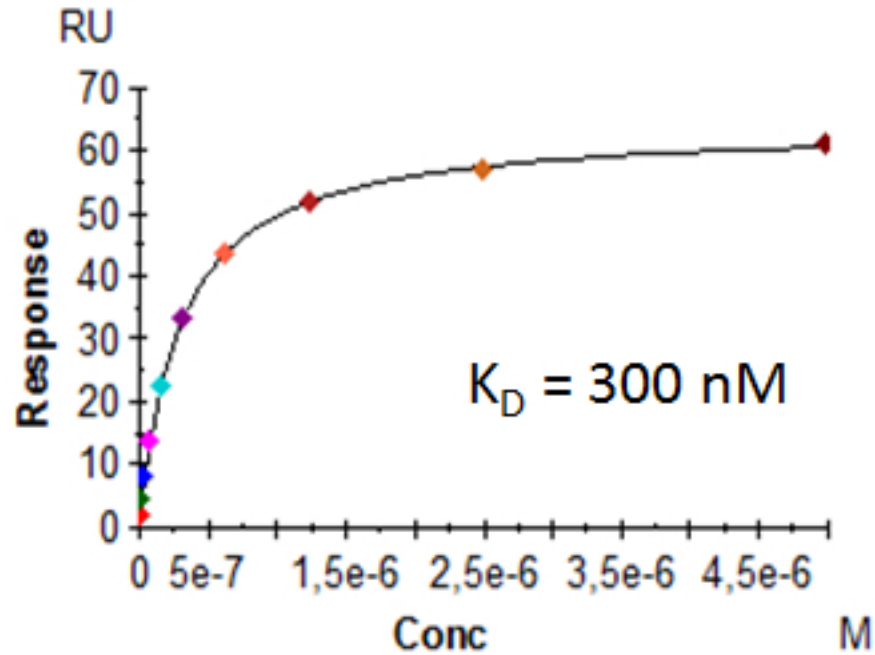

Supplement: pone.0197082.s001.pdf [file pone.0197082.s001.pdf]
